# Supplementary material for: A UHPLC-UV Method Development and Validation for Determining Kavalactones and Flavokavains in Piper methysticum (Kava)
Source: PubMed Central journal article supplement (PMC6479543; doi:10.3390/molecules24071245), 2019-03-30
Supplement: molecules-24-01245-s001.pdf [file molecules-24-01245-s001.pdf]

# TITLE: A UHPLC method Development and Validation for Determination of Kavalactones and Flavokavains in *Piper methysticum* (Kava).

Yijin Tang<sup>a</sup> & Christine Fields<sup>a</sup>

<sup>a</sup>Applied Food Sciences, Inc., 2500 Crosspark Road, Coralville, IA 52241

*KEYWORDS: Piper methysticum (Kava), kavalactones, flavokavains, (U)HPLC-UV, Mass spectra, isomerization, single-laboratory validation, quality control*

---

## Support Figures Legend

---

|                   |                                                                                                                  |
|-------------------|------------------------------------------------------------------------------------------------------------------|
| Support Figure 1. | UHPLC chromatography of Kava standard mixture and mass spectra of six major Kavalactones and three flavokavains. |
| Support Figure 2. | UHPLC chromatography of Kava standard mixture and individual six major Kavalactones and three flavokavains       |
| Support Figure 3. | Calibration curves of Kava standards of six major Kavalactones and three flavokavains.                           |

---

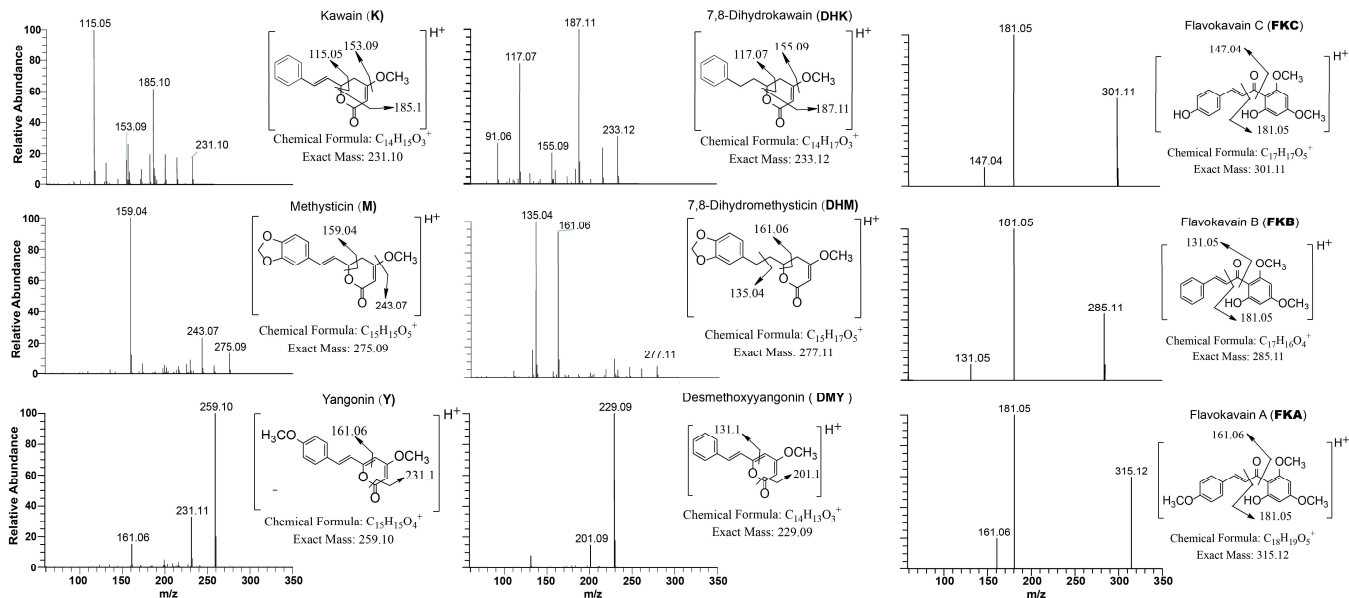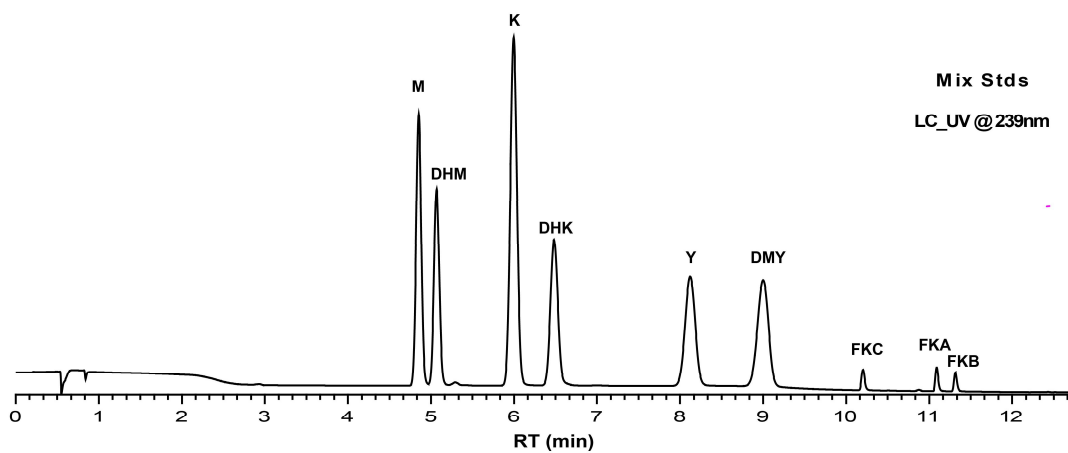

Support Figure 1

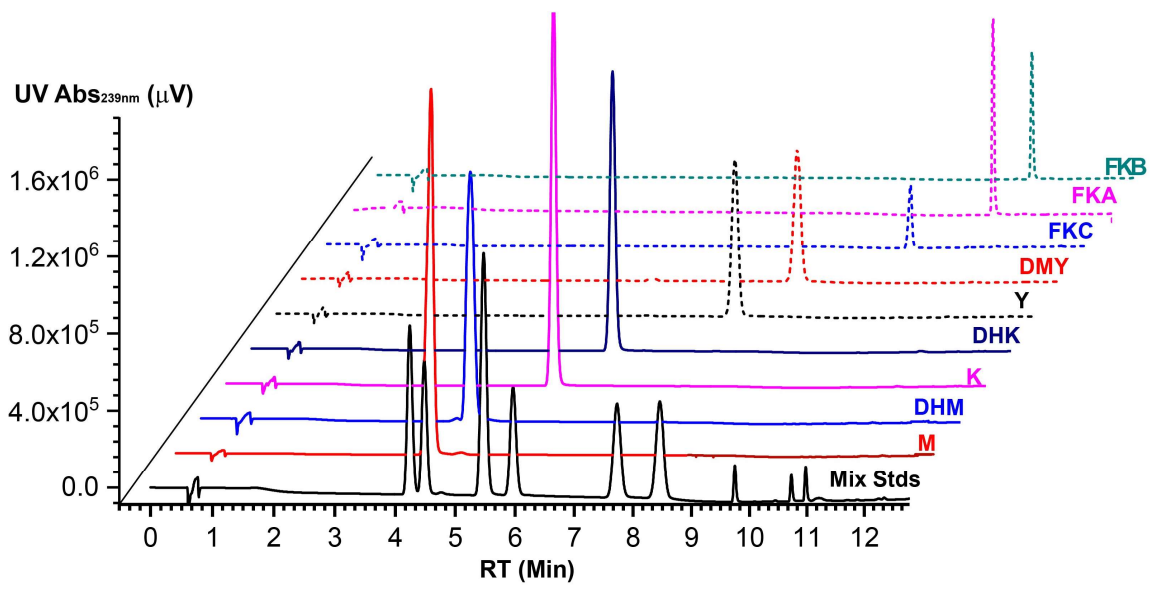

Support Figure 2

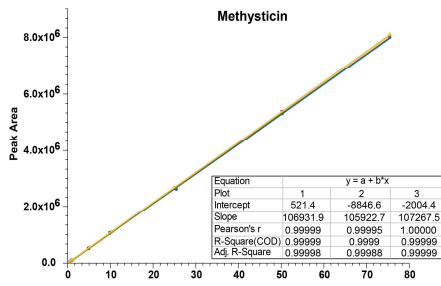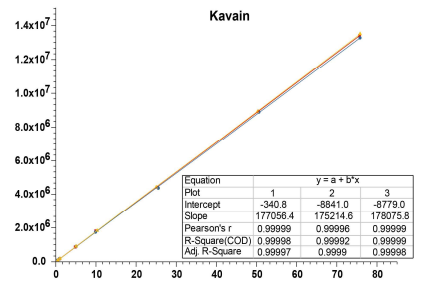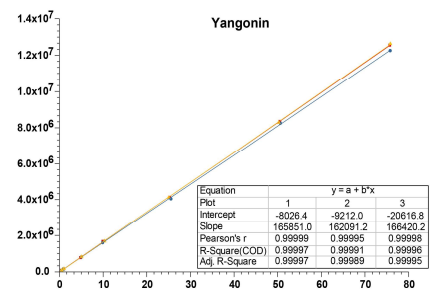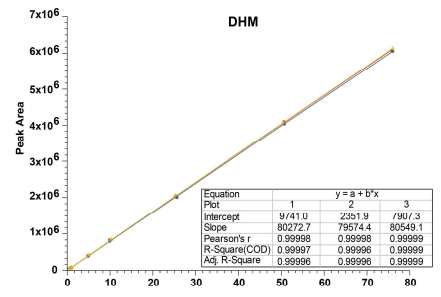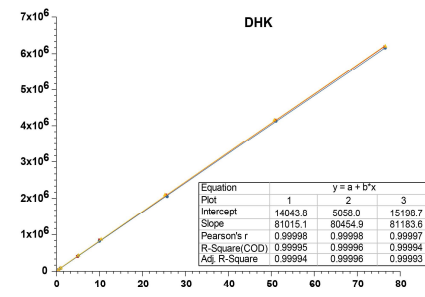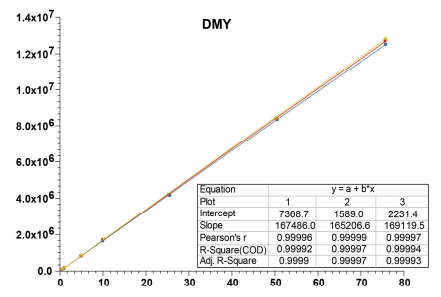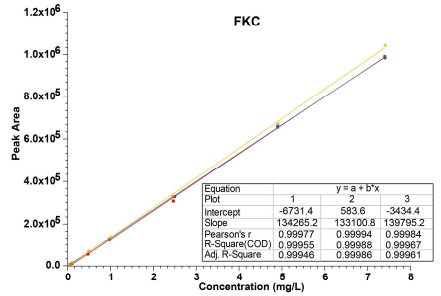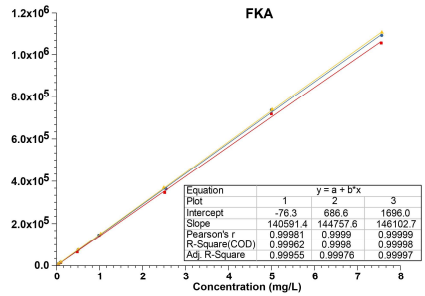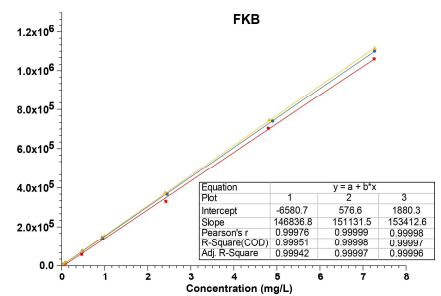

Support Figure 3
